# Supplementary material for: Cryogenic fluorescence spectroscopy of oxazine ions isolated in vacuo
Source: Royal Society of Chemistry journal article supplement (doi:10.1039/d3cp04615j), 2023-01-01
Supplement: d3cp04615j1.pdf [file d3cp04615j1.pdf]

## Electronic Supplementary Information

### Cryogenic fluorescence spectroscopy of oxazine ions isolated *in vacuo*

Christina Kjær,<sup>\*a</sup> Emil Vogt,<sup>b</sup> Jeppe Langeland,<sup>a</sup> Nanna Falk Christensen,<sup>b</sup> Thomas Toft Lindkvist,<sup>a</sup> Henrik G. Kjaergaard,<sup>b</sup> and Steen Brøndsted Nielsen<sup>a</sup>

<sup>a</sup> Department of Physics and Astronomy, Aarhus University, DK-8000 Aarhus C, Denmark. Email: christina.kjaer@phys.au.dk

<sup>b</sup> Department of Chemistry, University of Copenhagen, DK-2100 Copenhagen Ø, Denmark.

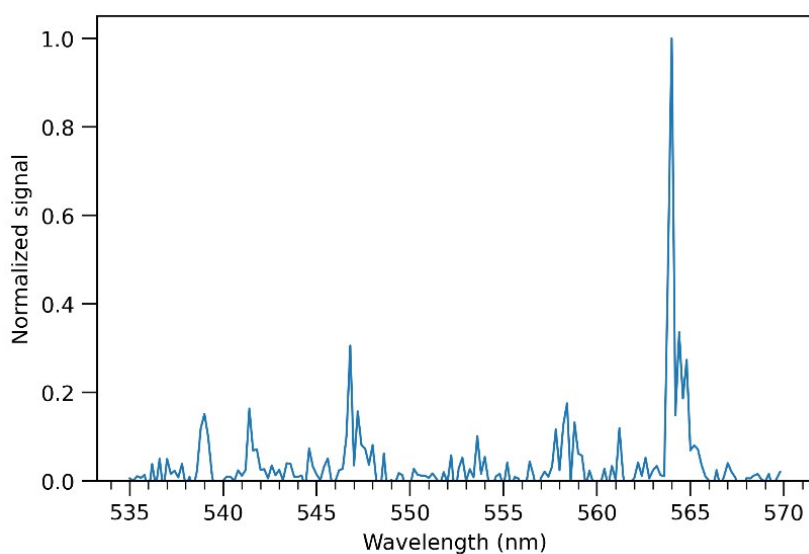

Fig. S1. Fluorescence-excitation spectrum of cold (100 K) R<sup>+</sup> obtained at low laser power (<0.01 mW).

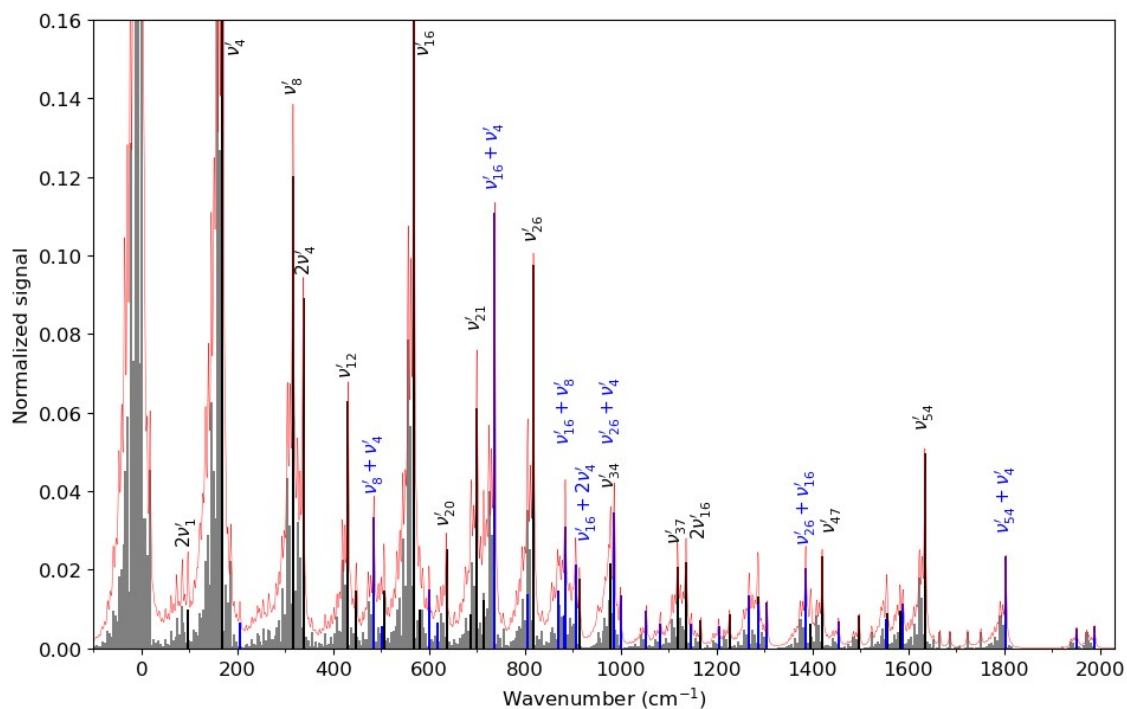

Fig. S2. Simulated Franck-Condon absorption spectrum of  $R^-$  at 100 K obtained using B3LYP/aug-cc-pVTZ time-dependent density function theory. All transitions (grey) contributing to the total simulated absorption spectrum (red). The black transitions are significant transitions from the vibrational ground state ( $0''$ ) to the final state indicated by the labels ( $\nu'$ ). Blue transitions involve combinations of two or more of the black transitions.

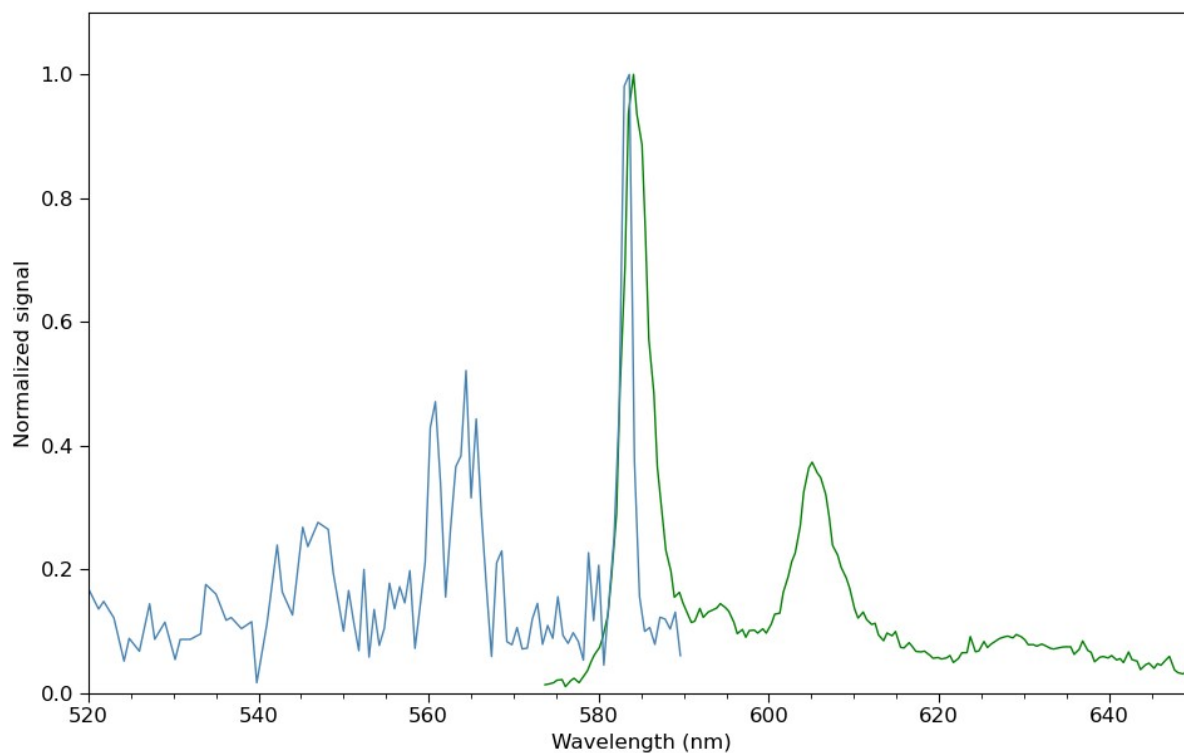

Fig. S3. 100 K fluorescence-excitation spectrum (blue) of gaseous  $Ox-170^+$  obtained with lower laser power ( $<0.03mW$ ) than the spectrum shown in Fig. 5.

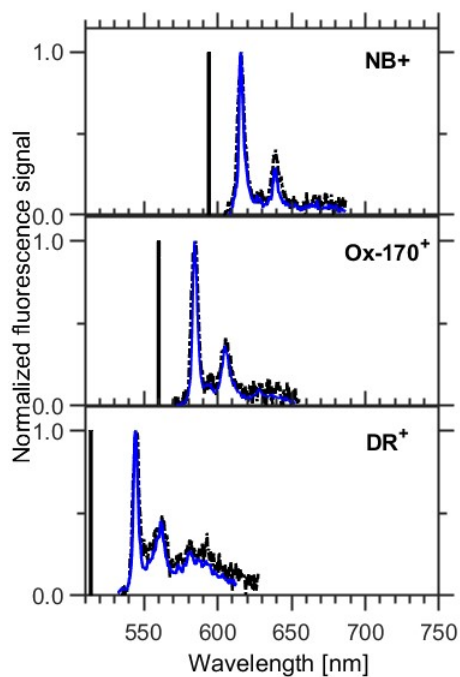

Fig. S4. Low-temperature fluorescence spectra obtained at LUNA2 using two different spectrometers combined with an iCCD camera. Black spectra were obtained with a shamrock spectrometer and blue spectra with a kymera spectrometer.

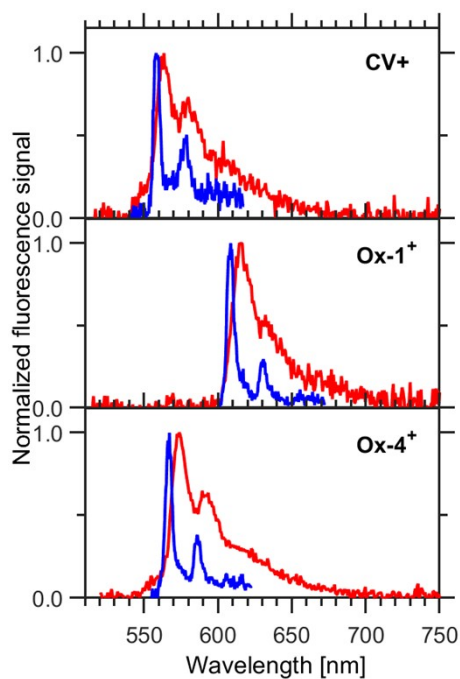

Fig. S5. Fluorescence spectra obtained at room temperature (red) and at 100 K (blue). Room-temperature spectra were obtained with the LUNA instrument<sup>1</sup> and taken from.<sup>2</sup> Low-temperature spectra were obtained with the LUNA2-instrument using a shamrock spectrometer combined with an iCCD camera, whereas the LUNA instrument is equipped with a shamrock spectrometer and a CCD camera.

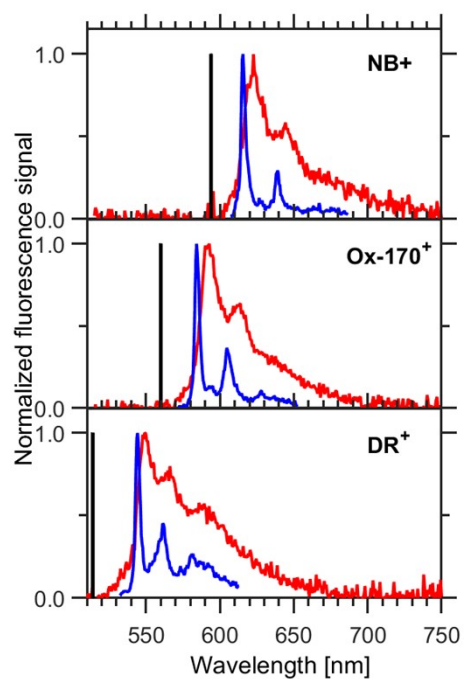

Fig. S6. Fluorescence spectra obtained at room temperature (red) and at 100 K (blue). The black lines indicate excitation wavelengths which were 594 nm (**NB+**), 561 nm (**Ox-170+**), and 514 nm (**DR+**). Room-temperature spectra were obtained using the LUNA instrument. Low-temperature spectra were obtained using the LUNA2 instrument with a Kymera spectrometer combined with an iCCD camera.

| Mode | S <sub>0</sub> [cm <sup>-1</sup> ] | S <sub>1</sub> [cm <sup>-1</sup> ] | Mode | S <sub>0</sub> [cm <sup>-1</sup> ] | S <sub>1</sub> [cm <sup>-1</sup> ] | Mode | S <sub>0</sub> [cm <sup>-1</sup> ] | S <sub>1</sub> [cm <sup>-1</sup> ] |
|------|------------------------------------|------------------------------------|------|------------------------------------|------------------------------------|------|------------------------------------|------------------------------------|
| 1    | 59.7                               | 48.2                               | 21   | 726.5                              | 699.6                              | 41   | 1296.1                             | 1226.8                             |
| 2    | 84.3                               | 77.7                               | 22   | 749.8                              | 700.3                              | 42   | 1302.4                             | 1241.7                             |
| 3    | 178.0                              | 157.1                              | 23   | 757.5                              | 714.0                              | 43   | 1328.8                             | 1285.7                             |
| 4    | 185.4                              | 168.7                              | 24   | 780.0                              | 745.4                              | 44   | 1368.4                             | 1292.9                             |
| 5    | 186.5                              | 172.2                              | 25   | 834.2                              | 787.9                              | 45   | 1419.5                             | 1357.1                             |
| 6    | 255.3                              | 253.7                              | 26   | 835.1                              | 817.8                              | 46   | 1454.2                             | 1396.6                             |
| 7    | 304.3                              | 303.2                              | 27   | 854.3                              | 819.0                              | 47   | 1484.4                             | 1420.2                             |
| 8    | 349.5                              | 316.3                              | 28   | 875.9                              | 853.3                              | 48   | 1504.3                             | 1435.6                             |
| 9    | 356.0                              | 341.1                              | 29   | 876.4                              | 858.9                              | 49   | 1538.3                             | 1497.1                             |
| 10   | 443.6                              | 343.4                              | 30   | 877.2                              | 863.1                              | 50   | 1558.0                             | 1523.3                             |
| 11   | 453.9                              | 428.7                              | 31   | 905.7                              | 897.7                              | 51   | 1599.2                             | 1539.0                             |
| 12   | 460.7                              | 431.1                              | 32   | 950.9                              | 913.8                              | 52   | 1608.4                             | 1555.1                             |
| 13   | 469.5                              | 436.8                              | 33   | 986.7                              | 958.7                              | 53   | 1632.7                             | 1582.8                             |
| 14   | 473.6                              | 448.0                              | 34   | 987.0                              | 978.5                              | 54   | 1678.9                             | 1634.6                             |
| 15   | 526.7                              | 506.1                              | 35   | 1106.7                             | 979.2                              | 55   | 3155.2                             | 3150.6                             |
| 16   | 578.7                              | 568.2                              | 36   | 1122.0                             | 1106.1                             | 56   | 3155.5                             | 3154.4                             |
| 17   | 590.0                              | 580.4                              | 37   | 1160.0                             | 1118.4                             | 57   | 3176.1                             | 3174.1                             |
| 18   | 639.9                              | 616.0                              | 38   | 1160.9                             | 1159.0                             | 58   | 3176.5                             | 3179.2                             |
| 19   | 661.8                              | 633.1                              | 39   | 1227.6                             | 1166.6                             | 59   | 3185.0                             | 3181.9                             |
| 20   | 678.1                              | 636.2                              | 40   | 1251.0                             | 1213.2                             | 60   | 3185.5                             | 3191.8                             |

Table. S1. B3LYP/aug-cc-pVTZ calculated harmonic transition wavenumbers in S<sub>0</sub> and S<sub>1</sub> of R<sup>•</sup>. The modes in increasing energy order for both S<sub>0</sub> and S<sub>1</sub>. The Duschinsky matrix that is needed to correlate the modes is provided in the repository.

| Ion                                                                   | NB <sup>+</sup> | Ox-1 <sup>+</sup> | Ox-170 <sup>+</sup> | Ox-4 <sup>+</sup> | CV <sup>+</sup> | DR <sup>+</sup> | R <sup>•</sup> |
|-----------------------------------------------------------------------|-----------------|-------------------|---------------------|-------------------|-----------------|-----------------|----------------|
| Calculated S <sub>0</sub> →S <sub>1</sub> excitation wavelengths (nm) | 510.4           | 506.5             | 494.8               | 467.4             | 479.4           | 483.6           | 457.6          |

Table. S2. Calculated vertical S<sub>0</sub>→S<sub>1</sub> excitation energies at the B3LYP/aug-cc-pVTZ level of theory for all ions under study.

## References

- 1 M. H. Stockett, J. Houmøller, K. Støchkel, A. Svendsen and S. Brøndsted Nielsen, *Rev. Sci. Instrum.*, 2016, **87**, 53103.
- 2 C. Kjær and S. Brøndsted Nielsen, *Phys. Chem. Chem. Phys.*, 2019, **21**, 4600–4605.
